# Supplementary material
Source: publisher site journal article supplement (https://www.dovepress.com/article/243417)
Supplement: Supplementary file 1 [file get_supplementary_file.php]

**
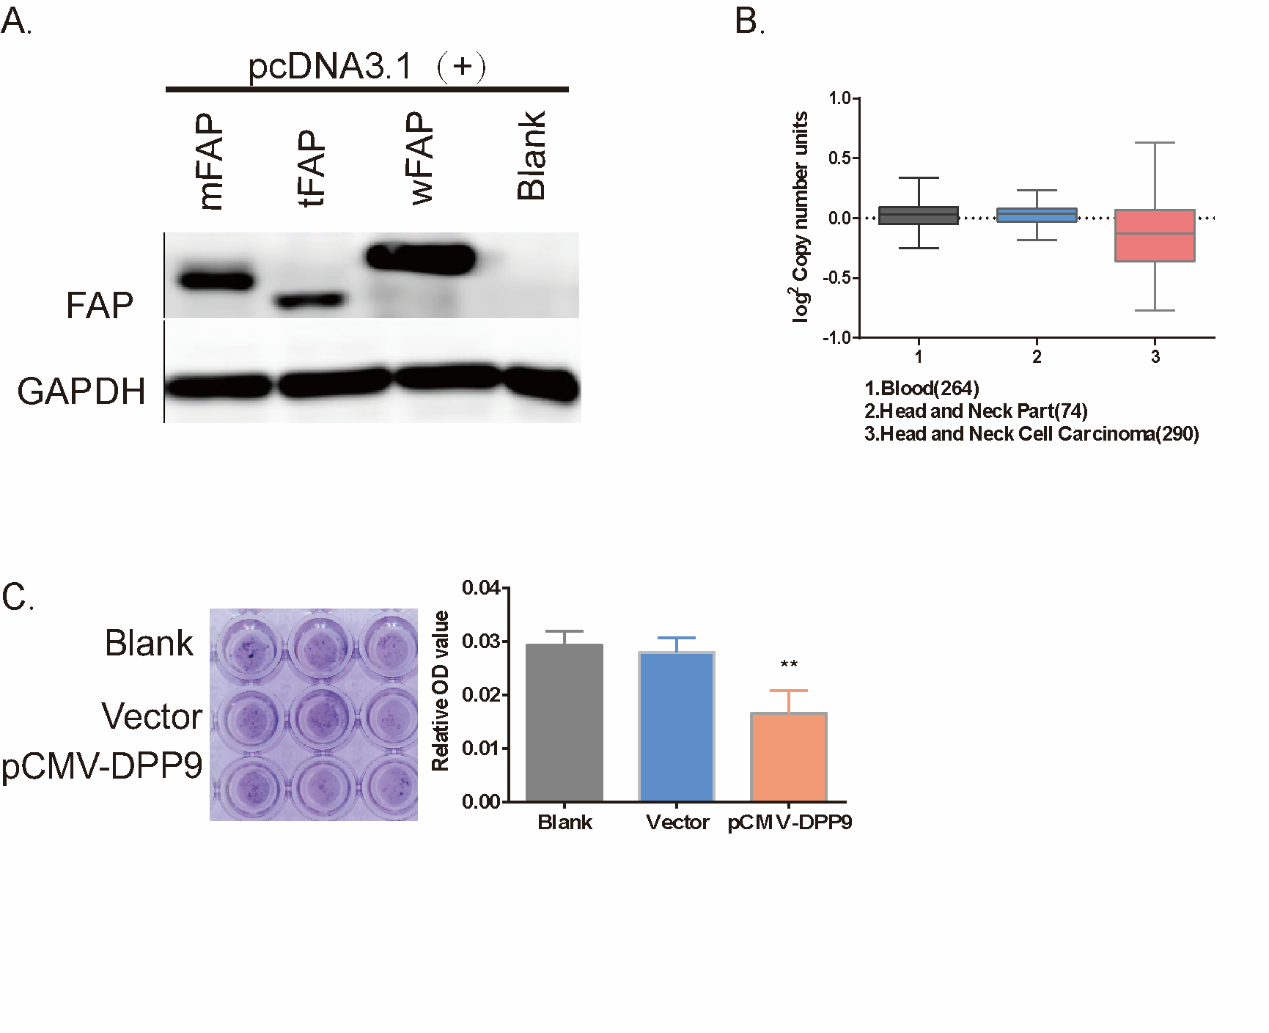
**

**Fig.S1 (A)** Verification of transfecting plasmid of pcDNA3.1+ wFAP/mFAP/tFAP into SCC9 cell line. **(B)** In the Oncomine database (The Cancer Genome Atlas - Head and Neck Squamous Cell Carcinoma (HNSCC) DNA Copy Number Data), HNSCC shows lower DPP9 copy number units compared with that in the blood sample and the Head and Neck part. **(C)** Adhesion assay showed DPP9 transfection can furtherly reduce the adhesion ability of cells.

**Table A1**. siRNA Primers used in transient silence (5’-3’)

| si-DPP9 :5’-3’ | GGUUAAUGCGGAAGGUUAAGA |
| --- | --- |
| si-DPP9 :3’-5’ | UUAACCUUCCGCAUUAACCGC |
| NC :5’-3’ | CGGUGAAAAGGUUGUUAGAGA |
| NC:3’-5’ | UUGAUCUCACCCACAGUUACC |

| si-FAP-1 :5’-3’ | GGAAAGAAAGGUGCCAAUA |
| --- | --- |
| si-FAP-1 :3’-5’ | CCUUUCUUUCCACGGUUAU |
| si-FAP-2 :5’-3’ | GAUGAUUCUUCCUCCUCAA |
| si-FAP-2 :3’-5’ | CUACUAAGAAGGAGGAGUU |
| NC :5’-3’ | UAAAAUCAGGACAAAGGGG |
| NC:3’-5’ | UUGGAGUACAGAUAAGCGA |

**TableA2**. Primers used in qPCR (5’-3’)

| DPP9-F | ACCTCCTACGACTTCCACAG |
| --- | --- |
| DPP9-R | CAGCGGTTTCATAGGGGACA |
| FAP-F | ATCTATGACCTTAGCAATGGAGAATTTGT |
| FAP-R | GTTTTGATAGACATATGCTAATTTACTCCCCAAC |
| GAPDH-F | AGAAGGCTGGGGCTCATTTG |
| GAPDH-R | AGGGGCCATCCACAGTCTTC |
